RESEARCH ARTICLE

# Development of Timolol Maleate-Loaded Poloxamer-co-Poly (acrylic acid) based hydrogel for controlled drug delivery

Raneem Mansoor<sup>1</sup>, Kashif Barkat<sup>1,2\*</sup>, Irfan Anjum<sup>3</sup>, Muhammad Aamir<sup>1</sup>, Syed Faisal Badshah<sup>4</sup>, Riaz Ullah<sup>5</sup>, Zafar Iqbal<sup>6</sup>, Muhammad Ahmer Raza<sup>7</sup>

**1** Faculty of Pharmacy, The University of Lahore, Lahore, Pakistan, **2** Faculty of Health Sciences, Equator University of Science and Technology, Masaka, Uganda, **3** Department of Basic Medical Sciences, Shifa College of Pharmaceutical Sciences, Shifa Tameer-e-Millat University, Islamabad, Pakistan, **4** Department of Pharmacy, Faculty of Medical and Health Sciences, University of Poonch Rawalakot, Azad Kashmir, Pakistan, **5** Department of Pharmacognosy College of Pharmacy, King Saud University, Riyadh, Saudi Arabia, **6** Department of Surgery, College of Medicine, King Saud University, Riyadh, Kingdom of Saudi Arabia, **7** Department of Social and Clinical Pharmacy, Faculty of Pharmacy in Hradec Králové, Charles University in Prague, Prague, Czech Republic

\* [kashif.barkat@pharm.uol.edu.pk](mailto:kashif.barkat@pharm.uol.edu.pk)

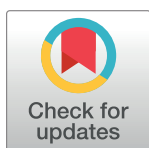

## OPEN ACCESS

**Citation:** Mansoor R, Barkat K, Anjum I, Aamir M, Badshah SF, Ullah R, et al. (2024) Development of Timolol Maleate-Loaded Poloxamer-co-Poly (acrylic acid) based hydrogel for controlled drug delivery. PLoS ONE 19(12): e0309101. <https://doi.org/10.1371/journal.pone.0309101>

**Editor:** Muhammad Muzamil Khan, Brigham and Women's Hospital, UNITED STATES OF AMERICA

**Received:** April 28, 2024

**Accepted:** August 5, 2024

**Published:** December 20, 2024

**Copyright:** © 2024 Mansoor et al. This is an open access article distributed under the terms of the [Creative Commons Attribution License](https://creativecommons.org/licenses/by/4.0/), which permits unrestricted use, distribution, and reproduction in any medium, provided the original author and source are credited.

**Data Availability Statement:** All the findings related to data are present within the manuscript.

**Funding:** The authors wish to thank Researchers Supporting Project Number (RSPD2024R706) at King Saud University Riyadh Saudi Arabia for financial support. (The Project PI is Z.I.).

**Competing interests:** The authors have declared that no competing interests exist.

## Abstract

Free radical polymerization technique was used to formulate Poloxamer-188 based hydrogels for controlled delivery. A total of seven formulations were formulated with varying concentrations of polymer, monomer and cross linker. In order to assess the structural properties of the formulated hydrogels, Fourier Transform Infrared Spectroscopy (FTIR), Thermogravimetric analysis (TGA), Differential Scanning Calorimetry (DSC), Scanning electron microscopy (SEM), and X-ray diffraction (XRD) were carried out. To assess the effect of pH on the release of the drug from the polymeric system, drug release studies were carried in pH 1.2 and 7.4 and it was found that release of the drug was significant in pH 7.4 as compared to that of pH 1.2 which confirmed the pH responsiveness of the system. Different kinetic models were also applied to the drug release to evaluate the mechanism of the drug release from the system. To determine the safety and biocompatibility of the system, toxicity study was also carried out for which healthy rabbits were selected and formulated hydrogels were orally administered to the rabbits. The results obtained suggested that the formulated poloxamer-188 hydrogels are biocompatible with biological system and have the potential to serve as controlled drug delivery vehicles.

## Introduction

The significance of developing a regulated drug delivery system has greatly increased in contemporary pharmaceutical research [1]. Controlled drug delivery systems (CDDS) offer several advantages, including decreased dose frequency, protection of drugs from degradation, minimal side effects, targeted drug administration, release controlled by stimuli, and improved patient compliance through more effective therapy [2–4]. The use of polymeric three-

dimensional networks has gained significant importance in recent years as a viable technology for controlled drug delivery in innovative drug carriers [5]. Smart gels consist of a diverse array of monomers and polymers that combine to fabricate a three-dimensional polymeric network [6]. Monomers and polymers can be either natural or synthetic, and they can be either biodegradable or non-biodegradable. They have hydrophilic functional groups in their structure, which allows them to interact with water or biological fluids. Smart gels exhibit a pliable and supple texture, making them similar in appearance to bodily tissues [7, 8]. Poloxamers are hydrophilic nonionic triblock copolymers which are composed of polar and nonpolar blocks. These both blocks confer amphiphilic and surface-active properties to Poloxamers. They have gained specific attention in biomedical applications. Among various Poloxamers, Poloxamer 407 also known as P 407, Pluronic F127 or PF 127 have gained much attention temperature sensitivity, biodegradable property and biocompatibility [9]. The hydrophilic functional groups of polymers create a network structure through covalent bonding. This structure allows the polymers to swell in aqueous environments at physiological pH and temperature, while yet remaining intact and not dissolving [10]. The polymers and monomers utilized in gel production contain hydroxyl ( $-OH$ ), amide ( $-CONH_2$ ), carboxylic ( $-COOH$ ), and sulfonic ( $-SO_3H$ ) hydrophilic functional groups. These functional groups have the potential to absorb a significant amount of water, resulting in swelling [11]. Polymeric gels are utilized in several fields such as diagnosis, tissue engineering, artificial muscle regeneration, cell separation, wound dressing, biosensors, wastewater treatment, enzyme immobilization, ophthalmological devices, bio membranes, and medical and pharmaceutical applications [8, 12, 13].

Of all the controlled release polymeric systems, pH sensitive gels have received significant attention and a wide range of monomers and polymers have been extensively explored. Acrylic acid (AA) is a hydrophilic monomer that is widely utilized in the production of polymeric gels. This is due to its capacity to absorb water and expand significantly in biological or aquatic environments, making it categorized as a superabsorbent substance. The carboxylic group of acrylic acid exhibits a significant affinity for water, easily undergoes ionization, and has the ability to absorb water in quantities several times its own weight. The equilibrium swelling of an acrylic acid gel is influenced by the ionic strength and pH of the fluid in which it swells [14]. We developed a new type of polymeric gel made from poly (acrylic acid) and Pluronic F127 that is sensitive to changes in pH. This gel was designed for the controlled release of an anti-angina drug when taken orally. Pluronic F 127 is a white, tasteless, odorless and water-soluble triblock copolymer of polyethylene oxide-polypropylene oxide-polyethylene oxide (E106 P70 E106) having 12600 molecular weight. It is a nonionic surfactant containing 70 to 79 percent hydrophilic group in its structure [15]. Pluronic F127 exhibits thermal gelling property, 20% (w/v) aqueous solution shows sol-gel transition at room temperature. Above critical micelle temperature, PF127 self-assemble at gel state to form compact spherical micelles. However, by rapid dilution with large quantity of water micelles losses its integrity. Due to its enormous properties it has been used as carrier of bioactive molecules [16]. Hydrogel systems have been developed for the efficient delivery of the timolol maleate [17–19].

This study focuses on the fabrication and analysis of Pluronic F127-co-poly (acrylic acid) gels employing methylene bisacrylamide as a cross-linker through the process of free radical polymerization. These gels exhibit biocompatibility as a result of the biocompatible nature of both the polymer and monomer. The Food and Drug Administration (FDA) has granted approval for the use of Pluronic F127 and AA as medicinal ingredients and food additives [20, 21]. pH-sensitive and insoluble in water, Pluronic F127-co-poly (acrylic acid) smart gels for the controlled delivery of Timolol Maleate were fabricated and thoroughly characterized.

## Materials and methods

### Ingredients

Ingredients of analytical grade employed in the fabrication of Timolol Maleate-Loaded Poloxamer-co-Poly(acrylic acid) Based Hydrogels were Timolol Maleate (Pharmacosol, Pakistan), Pluronic F127 (Sigma Aldrich, Germany), Acrylic acid (Sigma Aldrich, Germany), Ammonium persulphate (Merck LGea, Germany), Sodium hydroxide (Merck LGea, Germany), Potassium-dihydrogen-phosphate (Merck, Germany), Potassium chloride (Merck, Germany), Phosphoric acid (Merck, Germany), Acetone (Merck, Germany), Hydrochloric acid (Merck, Germany), Methylene bisacrylamide (Sigma Aldrich, UK), Ethanol (Sigma Aldrichco, Germany) and distilled water (Central Lab, University of Lahore).

### Instrument

Equipment used during the study were weight balance (Mettler), Magnetic stirrer (Critikon), Water bath (Ohaus), Vacuum oven (Daiban labtech), USP dissolution apparatus (Curio), Vortex mixer (Daiban labtech), pH meter (Adwa), Sonicator (Rohs), FTIR spectrophotometer (Perkin Elmer), Test tubes (Pyrex, France). Glass beakers (Pyrex, France), Cylinder (Pyrex, France), Glass rod (Pyrex, France), Petri dishes (Pyrex, France), Pipette (Pyrex, France).

### Fabrication of Timolol Maleate-Loaded Poloxamer-co-Poly (acrylic acid) based hydrogels

Seven different hydrogel formulations based on Timolol Maleate/Poloxamer (Pluronic F127) were developed with varying quantity of Polymer (Pluronic F127), Monomer (AA) & Cross-linker (MBA). One of the most preferred and reliable technique used for the hydrogels fabrication is free radical polymerization technique [22].

### Method used for fabrication of controlled release hydrogels based on TiM/Poloxamer

The aqueous free radical polymerization method (FRPM) [23, 24], was used to fabricate controlled release hydrogels based on TiM/(Pluronic F127). Precise measurement of (Pluronic F127) was carried out using an electronic weighing balance. The weighed amount of polymer was placed into a beaker containing 5ml of pure water. The polymer was dissolved by stirring using a magnetic stirrer. The precise amount of monomer acrylic acid (AA) was subsequently added to the solubilized polymeric solution with continuous stirring. Table 1 provides the specific information. A specific quantity of initiator ammonium persulphate (APS) was measured before being dissolved in distilled water. The resulting solution was then combined with the pre-existing combination of polymer and monomer. Ultimately, the MBA (cross-linker)

**Table 1. Composition of TiM/Poloxamer hydrogel.**

| Sr.No. | Formulation Code | Poloxamer wt % | AA wt % | APS wt % | MBA wt % |
|--------|------------------|----------------|---------|----------|----------|
| 1      | TiM-GEL 1        | 0.20           | 20      | 0.24     | 0.20     |
| 2      | TiM-GEL 2        | 0.40           | 20      | 0.24     | 0.20     |
| 3      | TiM-GEL 3        | 0.60           | 20      | 0.24     | 0.20     |
| 4      | TiM-GEL 4        | 0.20           | 22      | 0.24     | 0.20     |
| 5      | TiM-GEL 5        | 0.20           | 24      | 0.24     | 0.20     |
| 6      | TiM-GEL 6        | 0.20           | 20      | 0.24     | 0.24     |
| 7      | TiM-GEL 7        | 0.20           | 20      | 0.24     | 0.28     |

<https://doi.org/10.1371/journal.pone.0309101.t001>

solution was obtained by adding a precisely measured quantity of MBA to distilled water using a magnetic stirrer. The cross-linker solution was added gradually, drop by drop, into the combination of polymer, monomer, and initiator while continuously employing a sonicator for sonication. This guarantees sufficient blending. Nitrogen was employed to eliminate trapped oxygen. The water bath was set to a constant temperature of 55°C, and the prepared mixture was then poured into labeled test tubes and submerged in the water bath. The test tubes were subjected to a heat treatment in a water bath for a duration of 2 hours at a temperature of 55°C, followed by 1 hour at 60°C, and finally 1 hour at 65°C. Subsequently, they were cooled to a temperature of 25°C. A sharp blade was used to precisely cut the produced hydrogels into 8mm discs, which were acquired by breaking the vials. The disc-shaped gel was purified by washing it with a solution of 50% ethanol to eliminate impurities. The manufactured discs were subjected to a drying process in an oven for a duration of 48 hours at a temperature of 40°C. The TiM/Pluronic F127 hydrogels were subsequently dried and stored in a dry container [25].

### Characterization of TiM/Poloxamer hydrogel

Characterization of the hydrogels were performed on swelling (water imbibition characteristic) and general aspects of formulation such as morphology and structural changes for the determination of drug release pattern of developed formulation. In addition, various other techniques were also employed including Fourier transform infrared spectroscopy (FTIR), Scanning electron microscopy (SEM), Differential scanning calorimetry (DSC), X-ray diffraction (XRD) and Thermo gravimetric analysis (TGA) for the characterization of TiM/Pluronic F127 hydrogels.

### FTIR studies

FTIR analysis was performed for the model drug TiM, TiM loaded and unloaded hydrogel discs to identify the functional groups. All the samples were finely powdered by crushing with the help of mortar and pestle. Spectrum quant data collection software in assembly with perkin elmer FTIR was employed. The powdered sample was then placed on crystal spot and scanned within range of  $4000\text{cm}^{-1}$  –  $600\text{cm}^{-1}$  [23, 26].

### SEM analysis

SEM technique was employed for the determination of shape and morphological features of TiM/Pluronic F127 based hydrogel formulations. Transition in polymer-network structure of TiM/Pluronic F127 Hydrogels was also determined. Hydrogels were segmented into small pieces using sharp blades. The segmented hydrogel sample was coated with gold for up to 20nm thickness and scanned under high energy electron beam [27].

### TGA analysis

Thermo gravimetric analyzer Q5000 series (West Sussex, United Kingdom.) was used for the analysis of the polymer (Pluronic F127), TiM loaded and unloaded formulations. Variations can occur in the chemical mass due to temperature change, therefore, TGA indicates any increase or reduction in sample mass. Polymer and prepared formulation were trituated and to reduce the particle size, sieve number 40 was used. A total of 1 mg of samples was used. Analysis was carried out under controlled conditions containing 22–23% oxygen and 78% nitrogen with temperature maintained at 20–900°C/min [27].

### Differential scanning calorimetry

The glass transition temperature ( $T_g$ ) of the polymer and formulation was observed using Differential Scanning Calorimetry (DSC). The DSC Q2000 (TA USA) instrument was used. The samples were pulverized and filtered through a sieve with a mesh size of 40 in order to obtain particles of the necessary size. We precisely measured and analyzed a range of samples weighing between 0.5mg and 1mg. This analysis was conducted using a purge of nitrogen gas at a flow rate of 20ml/min. The temperature and heating range were set at 0–400°C, with a heating rate of 20°C per minute [27].

### X-ray diffraction analysis (XRD)

XRD analysis was performed for the determination of crystalline phase of polymer and TiM. Samples were crushed into small particles and scanned at a range of 5° to 50° and rate of 1°/min [27].

### Hydrogels gelling time & yield percentage

Gelling time is the time at which formulation solution is observed to exhibit no flow. Prepared dried TiM/Poloxamer (Pluronic F127) hydrogels were weighed ( $m_i$ ) and immersed in water for 7 days at room temperature. Formulations were placed in oven to ensure drying and until no increase in mass ( $m_d$ ) was observed [28]. Equation used for the determination gel % and yield % of hydrogels:

$$\text{gel (\%)} = m_d/m_i \times 100$$

$$\text{yield (\%)} = m_d/m_e \times 100$$

$m_d$  = Mass of dried formulation

$m_i$  = Initial weight/mass

$m_e$  = entire mass of reactants of developed hydrogels

### Analysis for plotting calibration curve of TiM

For the analysis of TiM spectra, a UV- visible-spectrophotometer was employed. Fresh phosphate buffer was prepared considering USP method. TiM stock solution was prepared by weighing and dissolving 25mg TiM in 25ml phosphate buffer solution (7.4 pH). Stock solution beaker was placed on magnetic stirrer for 5 minutes to ensure adequate mixing. Seven dilutions were prepared in concentration of 10, 15, 20, 25, 30, 35 and 40 µg/ml from stock solution. These dilutions were analyzed on UV spectrophotometer (Shimadzu, Germany) at 294nm wavelength. Absorbance was recorded and calibration curve was plotted between recorded absorbance and known concentration by using Microsoft excel 2013 software [27].

### Loading of TiM

To formulate 1 percent TiM solution, 1g TiM was dissolved within 100ml phosphate buffer with a pH of 7.4. Previously dried hydrogel disc having 8.5mm in size were immersed in TiM solution (100 ml) at 25°C. Swollen TiM/Poloxamer (Pluronic F127) based hydrogel was removed from 1% TiM solution after 48hr. The hydrogels were rinsed and dried in oven [29].



### Swelling studies of poloxamer based formulations

The swelling behavior of fabricated hydrogels was observed using the gravimetric approach, specifically in reaction to high and low pH conditions. The hydrogels were exposed to 0.1M HCl with a pH of 1.2 and phosphate buffer solution with a pH of 7.4, which were prepared as buffers. The discs were weighed and then submerged in a solution of prepared buffers. The swollen hydrogels were extracted from the buffers after a specific predetermined period and weighed until a constant weight was reached [28]. For the determination of swelling ratio ( $S_r$ ) and percentage swelling (%S) of hydrogel, following equation was used;

$$\text{Swelling ratio} = \frac{M_t - M_0}{M_0}$$

$$\%S = S_r \times 100$$

Whereas,

$M_t$  = Mass of poloxamer hydrogel after swelling at “t” time

$M_0$  = Mass of dried poloxamer hydrogel gel at “0” time

$S_r$  = Swelling ratio

%S = Percentage swelling

### In-vitro TiM release studies

TiM loaded Poloxamer (Pluronic F127) hydrogels drug release was examined by selecting dissolution apparatus-II. At pH 1.2 & pH 7.4, TiM release was investigated. Vessels of dissolution apparatus were filled with simulated gastric and intestinal fluid of pH 1.2 and 7.4 at 37°C and speed of paddle maintained at 50 rpm. TiM loaded discs were carefully immersed in the vessel of fluids. After a predefined period, 5ml aliquot were taken from each dissolution apparatus vessel and added into separate glass vials. Similar buffers were added back into each vessel after samples withdrawn.  $\lambda_{\text{max}}$  295 nm wavelength was employed in UV spectrophotometer (Shimadzu, Germany) to find the absorbance of samples. The absorbance of samples used was compared with the standard solution absorbance to calculate the percentage of TiM release at different pH [30]. Drug release percentage was calculated by:

$$\text{Drug release percentage} = \frac{\text{Sample absorbance}}{\text{Standard absorbance}} \times 100$$

### Kinetic modeling

Various mathematical models were employed on data of dissolution studies to study the *in-vivo* behavior of hydrogel and release pattern of TiM from poloxamer (Pluronic F127) based formulations. The kinetic model that is the most suitable according to the dissolution data indicated its drug release mechanism [31].

**Zero order.** Zero order kinetic model indicates that the drug release from poloxamer based hydrogel is independent of concentration of TiM in hydrogel [31]. It can be explained through following formula:

$$Q_t = Q_0 + K_0$$

Where,

$Q_t$  = therapeutic agent quantity release within “t” time

$Q_0$  = initial quantity of therapeutic agent in hydrogel

$k_0$  = rate constant

### 2.13.2 First-order Kinetics

First order model indicates that the release of active pharmaceutical substance is dependent on the drug amount in hydrogel [31]. It is determined by:

$$\text{Log } C = \log C_0 - \frac{k_t}{2.303}$$

Here,

$C_0$  = initial active moiety amount within hydrogel disc

$K$  = 1<sup>st</sup> order rate constant

$-k/2.303$  = slope

### Higuchi-model

Higuchi model indicates that the drug is in accordance with the Fick's law of diffusion [31]. It can be determined by the following equation:

$$F_t = K_2 \times t_2^1$$

Whereas,

$F_t$  = quantity of drug remained undissolved

$k_2$  = Higuchi rate constant

### Korsmeyer Peppas model

This kinetic tool is used to explain release of active moiety entrapped in polymeric system [31]. It is expressed by below mentioned equation:

$$\frac{M_t}{M_\infty} = K_t^n$$

$\frac{M_t}{M_\infty}$  = amount of active moiety released from polymeric network system at "t" time

If  $n$  (diffusion exponent)  $\leq 0.45$  or  $0.45 < n < 0.89$ , release of active moiety follows fickian and non-Fickian diffusion respectively.

Moreover, when  $n = 0.89$  drug follows case-2 transport, and

when  $n > 0.89$  release follows super case-2 transport [31].

### Animal ethics

The study design for animal use has been reviewed and approved by the Institutional Research Ethics Committee, Faculty of Pharmacy, The University of Lahore, Lahore (IREC-2023-45). The study follows the International and Standard Guidelines Relating to Research Animals Ethics by Helsinki.

### Acute toxicity studies

An acute toxicity study was conducted following the parameters set by the Organization for Economic Co-Operation and Development (OECD). The study included six robust rabbits to assess the safety of TiM/poloxamer (Pluronic F127) hydrogels. The participants were randomly allocated into two groups, with an average weight range of 1.5 to 1.7 kg. The test group received oral administration of TiM/poloxamer (Pluronic F127) on the 1st, 7th, and 14th day, while the control group rabbits were just given food and water. Body weight was measured

prior to the commencement of the trial, as well as on the 7th and 14th day. Multiple clinical parameters were assessed. No deaths occurred during the entire duration of the trial. The combination of ketamine/xylazine I.M.(35 mg/kg and 15 mg/kg) was used to induce anesthesia in rabbits, followed by sodium pentobarbital (100 mg/kg body weight, IV) for euthanasia and decapitation. On the 15th day, rabbits underwent dissection to conduct histological analysis of multiple organs including the lung, heart, liver, spleen, stomach, small intestine, and kidney. Prior to the decapitation of rabbits, blood samples were collected for the purpose of biological assessment [32].

## Results and discussion

### FTIR analysis

FTIR spectra of unloaded TiM, drug loaded TiM-GEL 1 hydrogels (optimized formulation) and model drug (TiM) were observed. All hydrogel samples were examined in the range of  $4000\text{cm}^{-1}$  –  $600\text{cm}^{-1}$ . FTIR Spectrum for acrylic acid shows the presence of OH groups at the peak of wave number  $2987.92\text{ cm}^{-1}$ , whereas peaks at wave number  $1694.07\text{ cm}^{-1}$  and  $1634.46\text{ cm}^{-1}$  indicates C = O and C = C groups, respectively [33].

FTIR spectrum of poloxamer (Pluronic F127) was characterized by principal absorption peaks at  $2883.38\text{ cm}^{-1}$  that indicated C-H stretch aliphatic bands. Vibrations at  $1348.15\text{ cm}^{-1}$  are indicated in-plane O-H band. The peak at  $1107.06\text{ cm}^{-1}$  was also observed indicating C-O stretch [34].

FTIR spectrum of MBA showed peak at  $3,300\text{ cm}^{-1}$  which indicates the presence of N-H stretching vibration. Various peaks were observed within a range of  $1,557\text{ cm}^{-1}$  and  $716\text{ cm}^{-1}$  attributed for N-H and C = O of acrylamide group, respectively [35].

FTIR spectra of pure TiM showed a broad band appearing at  $3302\text{ cm}^{-1}$  due to O-H stretching vibrations. The presence of peak at  $3047\text{ cm}^{-1}$  belonged to N-H stretching. The absorption due to the NH group molecule was also supported by exhibition to the main peak around  $1494\text{ cm}^{-1}$ . The drug contains more than one C = N absorption present in the thiadizole moiety of the heterocyclic ring system. TiM showed a broad band appearing at  $2966\text{ cm}^{-1}$ ,  $2855\text{ cm}^{-1}$  and  $3302\text{ cm}^{-1}$  as observed in Fig 1(I) was due to O-H stretching vibrations. The bands at  $2968\text{ cm}^{-1}$ ,  $2891\text{ cm}^{-1}$ , and  $2854\text{ cm}^{-1}$  were due to aliphatic C-H stretching vibrations [36]. The drug contain more than one C = N absorption present in the thiadizole moiety of the heterocyclic ring system [37].

Keeping the FTIR spectra of unloaded and drug loaded hydrogel, it can be seen that FTIR spectra of the individual components like polymer, monomer and crosslinker are present in the unloaded hydrogel confirming successful crosslinking of the components while the specific spectra of drug can also be seen in the drug loaded hydrogel, confirming successful loading of the drug inside the system.

### Thermo-gravimetric analysis and differential scanning calorimetry

The thermal stability of drug loaded hydrogels, unloaded hydrogels and poloxamer (Pluronic F127) was conducted. TGA of loaded hydrogel indicates reduction in weight due to moisture loss. Approximately, 30% weight loss was observed at  $252.77^{\circ}\text{C}$ . Moreover, 50% weight loss was observed at  $346.86^{\circ}\text{C}$ . TGA of unloaded hydrogels indicated that about 20% weight loss was observed at  $163.81^{\circ}\text{C}$  and 30% at  $237.59^{\circ}\text{C}$  while 50% weight loss was observed at  $272.99^{\circ}\text{C}$ . TGA of poloxamer (Pluronic F127) that was employed as polymer in developed hydrogels showed 10% weight loss at  $97.94^{\circ}\text{C}$ . Only 3.77% weight loss was observed while increasing temperature from  $98^{\circ}\text{C}$  to  $400^{\circ}\text{C}$ . Poloxamer (Pluronic F127) was found to be stable against elevated temperature among all studied hydrogels [38]. The TGA of optimized loaded



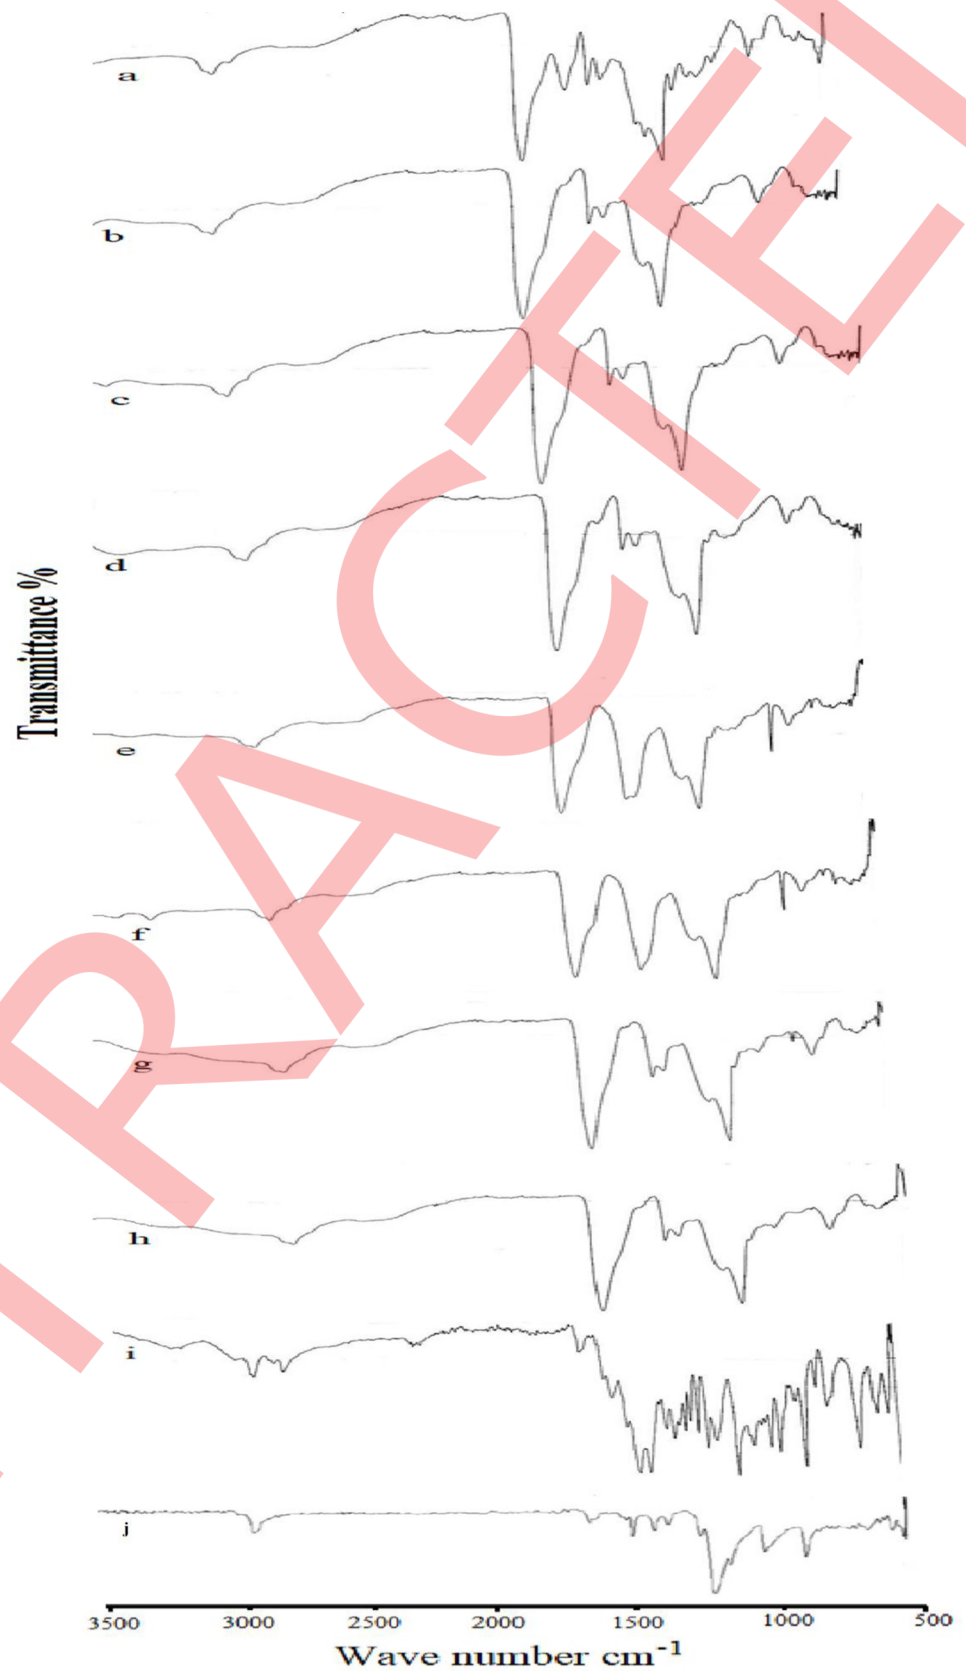

**Fig 1.** FTIR analysis of (a) loaded gel 1 (b) unloaded gel 1 (c) unloaded gel 2 (d) unloaded gel 3 (e) unloaded gel 4 (f) unloaded gel 5 (g) unloaded gel 6 (h) unloaded gel 7 (i) Timolol (j) Poloxamer.

<https://doi.org/10.1371/journal.pone.0309101.g001>

hydrogel (TiM-GEL 1), optimized unloaded hydrogel (TiM-GEL 1) and poloxamer (Pluronic F127) is displayed in Fig 2(I).

The melting of pure poloxamer (Pluronic F127) was initiated at a temperature of 53°C. A significant exothermic peak at 255°C indicated breakdown of polymeric chains upon DSC. Endothermic peak was observed between 290°C to 380°C indicating degradation of unloaded hydrogels [39]. Endothermic peak observed between 240°C to 250°C indicated moisture loss and polymeric breakdown. A significant exothermic peak between 380°C to 410°C indicated complete decomposition of loaded hydrogels. An endothermic peak was observed between 60°C to 75°C indicating polymeric chain breakage. Exothermic peak within the range of 90°C to 100°C indicated polymeric decomposition of poloxamer (Pluronic F127). The behavior of loaded, unloaded hydrogels and poloxamer (Pluronic F127) has been presented in Fig 1(B). In conclusion, TGA-DSC studies indicated that the developed TiM-GEL hydrogels are more stable than individual reaction contents [40].

## XRD

XRD of Timolol Maleate optimized loaded TiM-GEL-1, optimized unloaded TiM-GEL 1 and poloxamer (Pluronic F127) was performed. It was utilized to determine the amorphous or crystalline nature of samples that are presented in Fig 2(II). Different XRD patterns were observed of developed hydrogels when compared to pure polymer, confirming the fabrication of a new hydrogel polymeric system. Various low intensity peaks were observed which showed slight crystallinity of developed hydrogels [41]. Sharp characteristic poloxamer (Pluronic

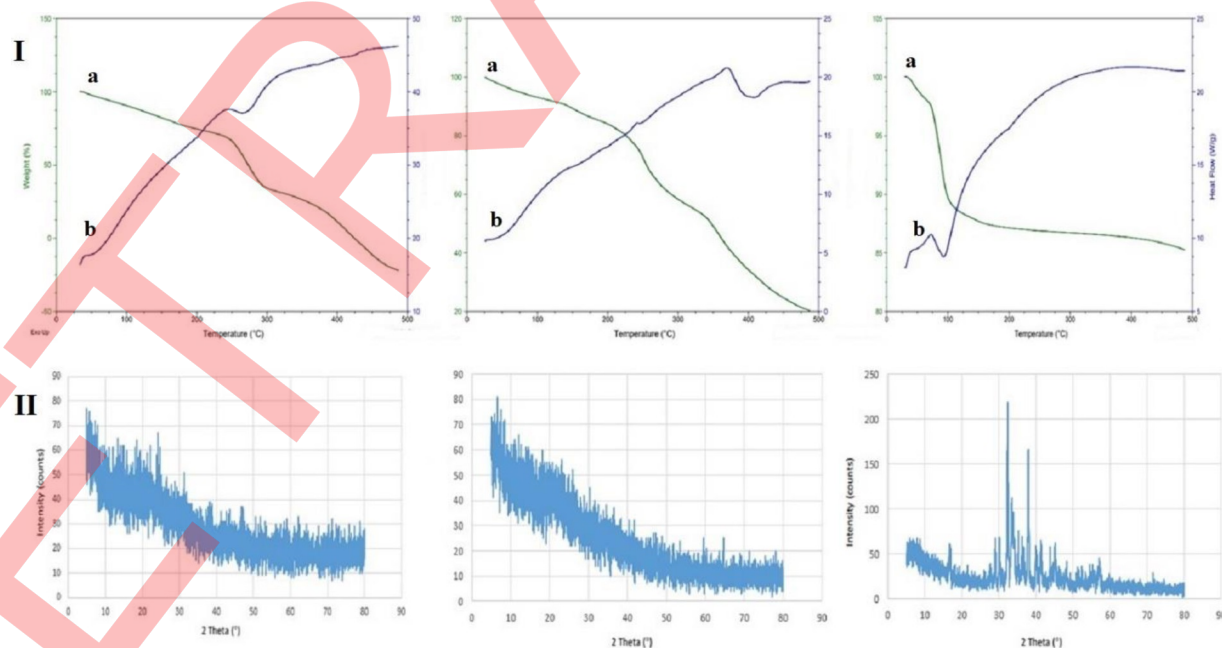

**Fig 2.** (I) TGA (a)-DSC(b) Timolol maleate loaded PXM-GEL I, unloaded PXM-GEL I and Poloxamer and (II) XRD of Loaded PXM-GEL-1, unloaded PXM-GEL-1 and Poloxamer.

<https://doi.org/10.1371/journal.pone.0309101.g002>

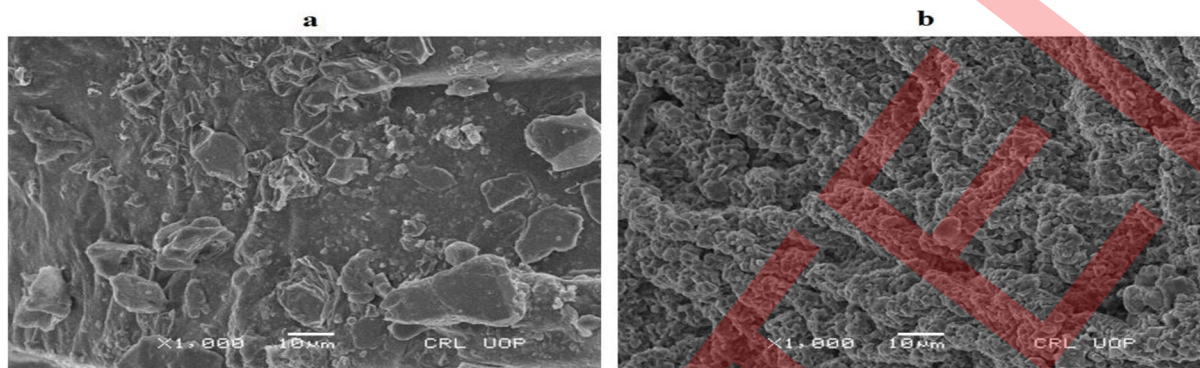

**Fig 3.** SEM of unloaded poloxamer gel I (a) and loaded poloxamer gel I (b).

<https://doi.org/10.1371/journal.pone.0309101.g003>

F127) peaks were observed at  $2\theta$  of  $19^\circ$  and  $23^\circ$ . Other high intensity peaks were also observed at  $2\theta$  of  $32^\circ$ - $37^\circ$  confirming its crystalline structure [42].

In case of Timolol Maleate loaded TiM-GEL-1 and unloaded TiM-GEL 1, no such intense peaks were observed as shown in Fig 2(II). The disappearance of such intense peaks of that of the polymer in both the systems depicts that an amorphous system has been formulated. Amorphous system has great potential to enhance the dissolution and solubility of crystalline drugs.

### Scanning electron microscopy

Scanning electron microscopy technique was employed to determine the structure of prepared hydrogels. It depicted the surface morphology of Timolol Maleate loaded optimized TiM-GEL1 and optimized unloaded TiM-GEL 1, respectively, shown in Fig 3. SEM images were taken at varying magnifications. Rough surfaces with micro-spaces were observed that were significant for water absorption and drug entrapment. Due to the presence of pores, TiM was easily entrapped into these regions. Surface morphology of the developed hydrogels indicated the tendency for excellent swelling behavior owing to water absorption through porous structure [43].

### Effect of reaction contents on gel %, yield % and gel time of fabricated hydrogel

For the influence evaluation of reaction contents on gel content, yield, and gel time of fabricated hydrogels, one variable was varied while the other variables were kept constant. It was indicated that upon increasing the amount of poloxamer (Pluronic F127) in fabrication of hydrogels, gel content, yield and gel time were increased [44]. In formulations ranging from TiM-GEL-1 to TiM-GEL-3, an increasing quantity of poloxamer (Pluronic F127) was employed, that resulted in increased water absorbency. Due to less amount of MBA, it wasn't able to cross link increased amount of poloxamer(Pluronic F127) chains with AA [45]. Thus, better results for gel content, yield and gel time were observed (Fig 4). In formulation series ranging from TiM- GEL-4 to TiM-GEL-5, yield % and gel% were improved due to high AA concentration, that lead to high reaction rate and more polymer chains entanglement with AA [46]. However, gel time was declined due to high number of free radicals. In formulation series TiM-GEL-7 to TiM-GEL-9, a high amount of cross linker was employed and decline in gel time was observed due to quick formation of polymeric system. However, better results were

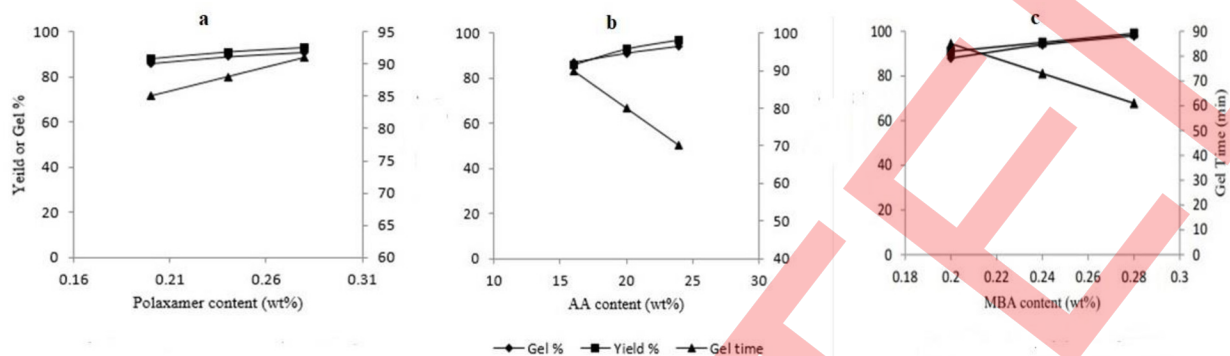

**Fig 4.** (a) Poloxamer (b) AA and (c) MBA influence on gelling time, gel % and yield %.

<https://doi.org/10.1371/journal.pone.0309101.g004>

obtained for yield% and gel% due to increased polymerization between acrylic acid and poloxamer (Pluronic F127) [47].

### Effect of contents on swelling of hydrogels

The swelling behavior of fabricated hydrogels in simulated gastric and intestinal fluids with pH 1.2 and 7.4, respectively has been presented in Fig 5. Different hydrogels formulation series were prepared with varying quantities of Pluronic F127, AA and MBA to observe the influence on dynamic swelling ( $Q_t$ ) and equilibrium water absorbency ( $Q_{\infty}$ ) [48].

Formulation series, TiM-GEL-1 to TiM-GEL-3 was with increasing ratios of Pluronic F127, TiM-GEL-4 to TiM-GEL-5 with increasing ratios of AA and TiM-GEL-6 to TiM-GEL-7 with increasing ratios of MBA were developed.

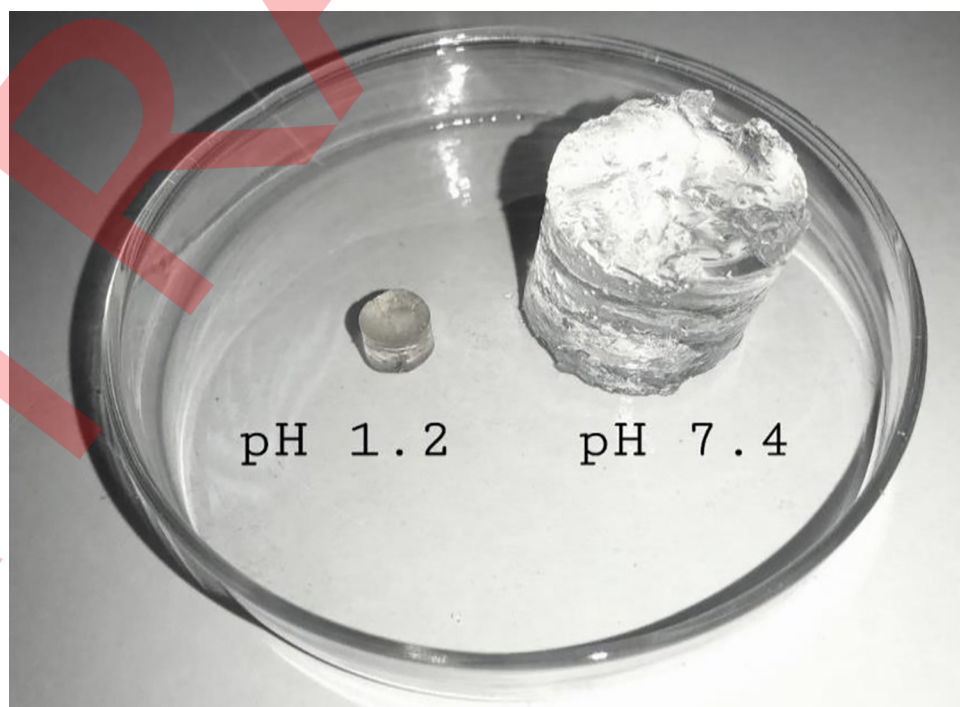

**Fig 5.** Swelling behavior of developed hydrogels in pH 1.2 & 7.4.

<https://doi.org/10.1371/journal.pone.0309101.g005>



### Poloxamer influence on swelling of hydrogels

In a formulation series TiM- GEL-1 to TiM-GEL-3, ratios of Pluronic F127 were increased to observe the effect on swelling of hydrogels. Owing to a greater number of -OH groups and -COOH groups in TiM-GEL, causes the polymer to be highly attractive towards swelling medium and that contributes to the hydrophilic characteristics of the gel. Conclusively, as we increased polymeric contents, more equilibrium water absorbency of hydrogels was observed due to ionization and electrostatic repulsion mechanism. High hydrogels swelling results were indicated with increasing concentration of poloxamer [48].

### Acrylic acid influence on swelling of hydrogels

Increased concentration of acrylic acid was employed in series of formulation TiM- GEL-4 and TiM- GEL-5. This led to an increased amount of carboxylate ions causing electrostatic repulsion. This improved the swelling media absorbency of hydrogels series TiM- GEL-4 and TiM- GEL-5 fabricated with increased amount of AA. On evaluation of the influence of increased amount of AA on hydrogels swelling media absorbency, it was indicated that higher water absorbency was observed with increased concentration of AA [49].

### MBA influence on swelling of hydrogels

Less swelling media absorbency was observed in hydrogels with increasing concentration of MBA as cross- linker in series of formulation TiM-GEL-6 to TiM-GEL-7. Increased MBA concentration resulted in formation of high-density network that led to reduced swelling media absorbency. Increasing cross linking density and condensing the structure causes a reduction in membrane free volume and swelling, respectively. Additionally, mobility of polymer chains was decreased that indicated a decline in swelling media absorbency. Different research has been conducted by varying the amount of MBA in fabrication of hydrogels. It has been observed the swelling of IPN hydrogels sensitive to pH. Increasing MBA concentration as a cross linker reduced swelling media absorbency. It was due to high cross linking density that resulted in low expansion and formation of high density cross linked system [49]. The swelling behavior of different concentrations of poloxamer hydrogels was displayed in Fig 5.

### Timolol Maleate (TiM) calibration curve

TiM stock-solution of various dilutions such as 10, 15, 20, 25, 30, 35, 40 µg/ml were prepared. The resulting solution was then observed on 295nm wavelength. Obtained calibration curve (Fig 6) was noted within the absorbance and known concentration (µg/ml) [50].

### TiM loading

To formulate a 1 percent TiM solution, 1g TiM was dissolved within 100ml phosphate buffer with a pH of 7.4. Hydrogel discs that were previously dried and cut in 7.5mm in length were immersed in TiM solution (100 ml) at 25°C. Swollen TiM/Pluronic F127 based hydrogel was removed from 1% TiM solution, after 48hr. The hydrogels were rinsed and dried in oven [51].

### In-vitro TiM release studies

At high and low pH, drug release of TiM from Pluronic F127-co-poly (AA) hydrogels was observed. It was then evaluated by immersing TiM based hydrogels in 900ml of of high pH (7.4) buffer solution and low pH (1.2). USP dissolution apparatus-II was employed with the temperature adjusted at 37°C. The samples were then evaluated at 295 nm using UV-spectrophotometer. High swelling was observed in high pH and low swelling in low pH. Hydrogels



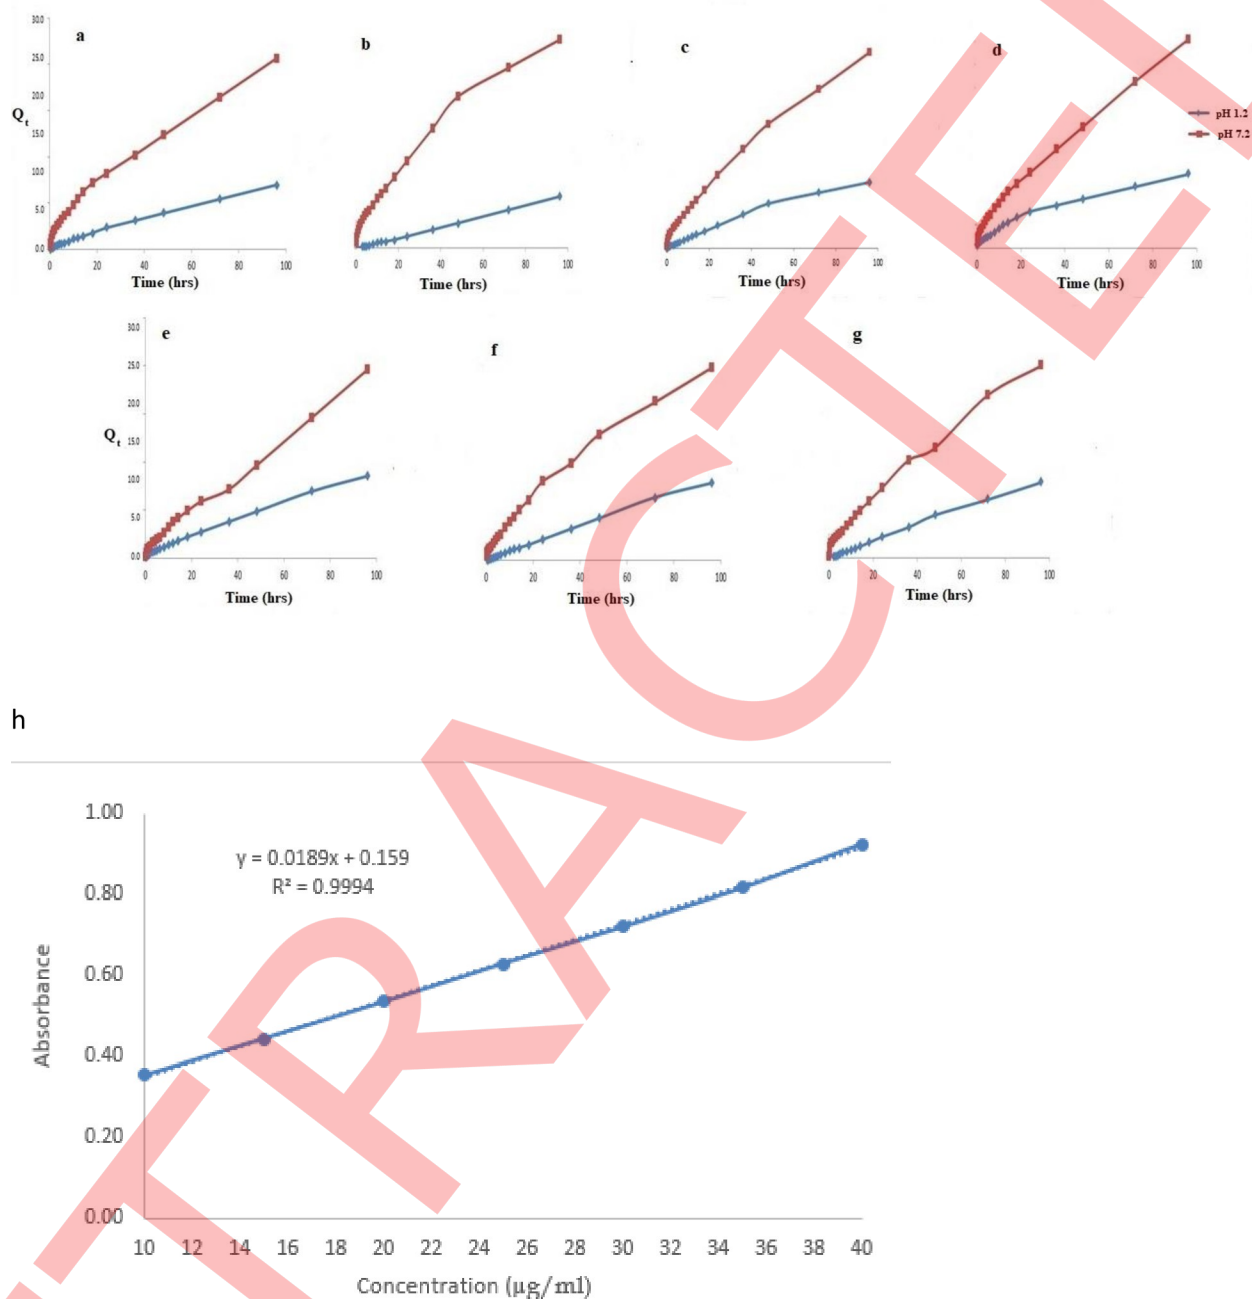

**Fig 6.** Swelling behavior of PXM Gel 1(a), 2(b), 3(c), 4(d), 5(e), 6(f) and 7(g), Calibration Curve of TiM (h).

<https://doi.org/10.1371/journal.pone.0309101.g006>

show less swelling in acidic medium due to the existence of protonated -COOH groups present in acrylic acid that results in strong hydrogen bonding and reduced electrostatic repulsion among groups of negative charges. Moreover, high pH causes a decline in hydrogen bonding and increased electrostatic repulsion among groups of negative charges, which leads to high hydrogel swelling [52].

In this study, better drug release of TiM hydrogels was observed for up to 24 hours in basic medium (pH 7.4). Fig 7 indicates the influence of various contents on hydrogels drug release. Drug release by formulation series TiM- GEL 1 to TiM-GEL-3 with increased polymer

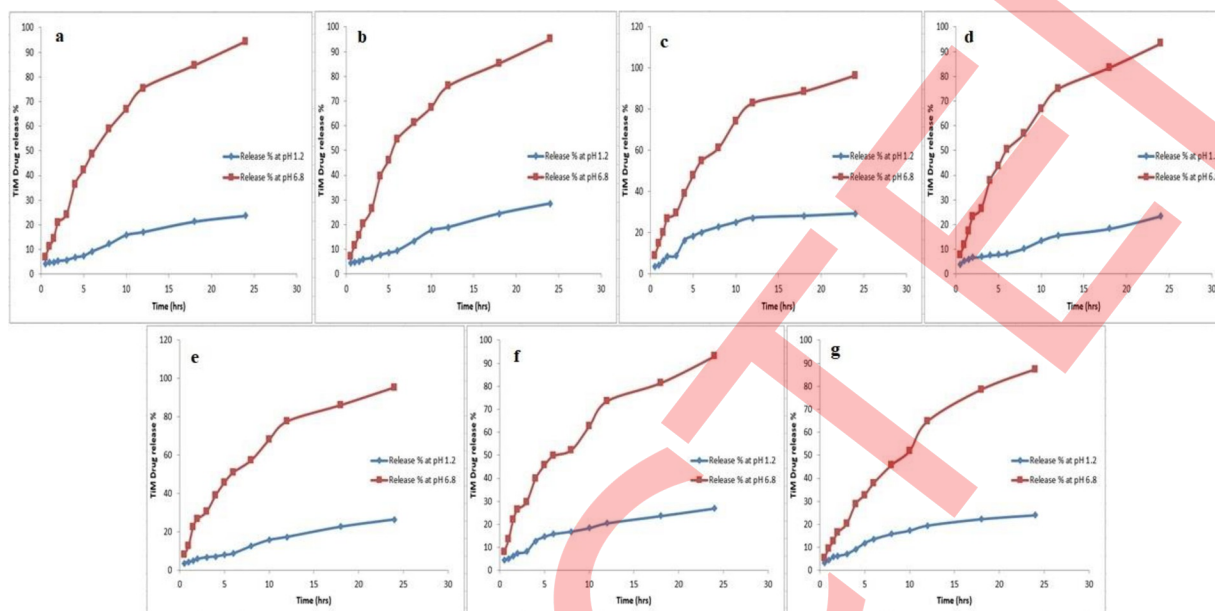

**Fig 7.** Timolol release pattern of PXM Gel 1(a), 2(b), 3(c), 4(d), 5(e), 6(f) and 7 (g).

<https://doi.org/10.1371/journal.pone.0309101.g007>

concentration [Fig 7(A)–7(C)], that lead to increased hydrogels swelling and higher drug release [53]. It was indicated by an increase in drug release from 94.3% to 96.3% in TiM-GEL 1 and 3, respectively. Moreover, drug release by TiM-GEL-4 and 5 with increased concentration of monomer (AA) is also indicated in Fig 7(D), 7(E). As increased concentration of monomer results in more carboxylate ions and increased electrostatic repulsion. This leads to increased hydrogel swelling and drug release. The higher the amount of cross-linker (MBA) used, lesser swelling of hydrogels is observed. It is due to the theory that cross-linker increases the cross-linking density which decreases the membrane free volume. This leads to condensed structure, reduced chain mobility and low hydrogel swelling. Reduced chain mobility of polymer causes retardation of water absorbency and declined drug release [54]. Influence of MBA on hydrogels drug release is shown in Fig 7(F), 7(G).

### Kinetic modeling

Various models were applied on TiM drug release such as First order, zero order, Korsmeyer-Peppas & Higuchi mathematical models. Different kinetic models' values of studied hydrogels are listed in Table 2. It was observed that TiM-GEL-1 to TiM-GEL-7 followed zero order

**Table 2.** Kinetic modeling of TiM loaded hydrogels.

| Formulations | Zero order | First order | Higuchi | Korsmeyer- Peppas |
|--------------|------------|-------------|---------|-------------------|
|              | R2         | R2          | R2      | R2                |
| TiM-GEL 1    | 0.9692     | 0.7987      | 0.9722  | 0.9756            |
| TiM-GEL 2    | 0.9766     | 0.8723      | 0.9778  | 0.9785            |
| TiM-GEL 3    | 0.9590     | 0.7849      | 0.9835  | 0.9823            |
| TiM-GEL 4    | 0.9815     | 0.8639      | 0.9881  | 0.9897            |
| TiM-GEL 5    | 0.9834     | 0.8570      | 0.9864  | 0.9956            |
| TiM-GEL 6    | 0.9931     | 0.8368      | 0.9917  | 0.9926            |
| TiM-GEL 7    | 0.9460     | 0.8699      | 0.9797  | 0.9932            |

<https://doi.org/10.1371/journal.pone.0309101.t002>

kinetic model. It refers to the constant quantity of TiM release from fabricated hydrogels. Values of regression- coefficient obtained as 0.9722 to 0.9797 when Higuchi model was applied. This indicated that drug delivery is mediated by diffusion mechanism via pores [55]. It was indicated that Korsmeyer- Peppas is followed by entire formulation series from TiM-GEL-1 to TiM-GEL-7 as the values of regression coefficient lie within range of Korsmeyer-Peppas model indicating that the formulations show non-fickian diffusion [55].

### Acute toxicity studies

Six healthy rabbits were incorporated into the study to determine the safety profile of TiM/ Pluronic F127 hydrogels. They were divided randomly into 2 groups weighing 1.5 to 1.7 kg, approximately. TiM/Pluronic F127 were orally administered to test group on 1st, 7th and 14th day while, only food and water was provided to the rabbits in control group. Body weight was observed before the study, and on the 7th and 14th day. Various clinical parameters were evaluated. The mortality was zero throughout the study. On 15th Day, blood samples from rabbits were taken for biological analysis and dissected for histopathological screening. The histopathological observation was done for various organs such as lung, heart, liver, spleen, stomach, small intestine and kidney (Figs 8–11) (Tables 3, 4) [32].

### Conclusion

Hydrogels that are sensitive to changes in pH were created using Pluronic F127 by the use of a free radical polymerization process. The cross-linked hydrogels that were created demonstrated various favorable attributes as a drug delivery system that is both pH dependent and regulated. The fabricated hydrogels exhibited a distinct swelling response that was influenced by the pH of the dissolution media (either pH -1.2 or 7.4) and water absorption. The swelling

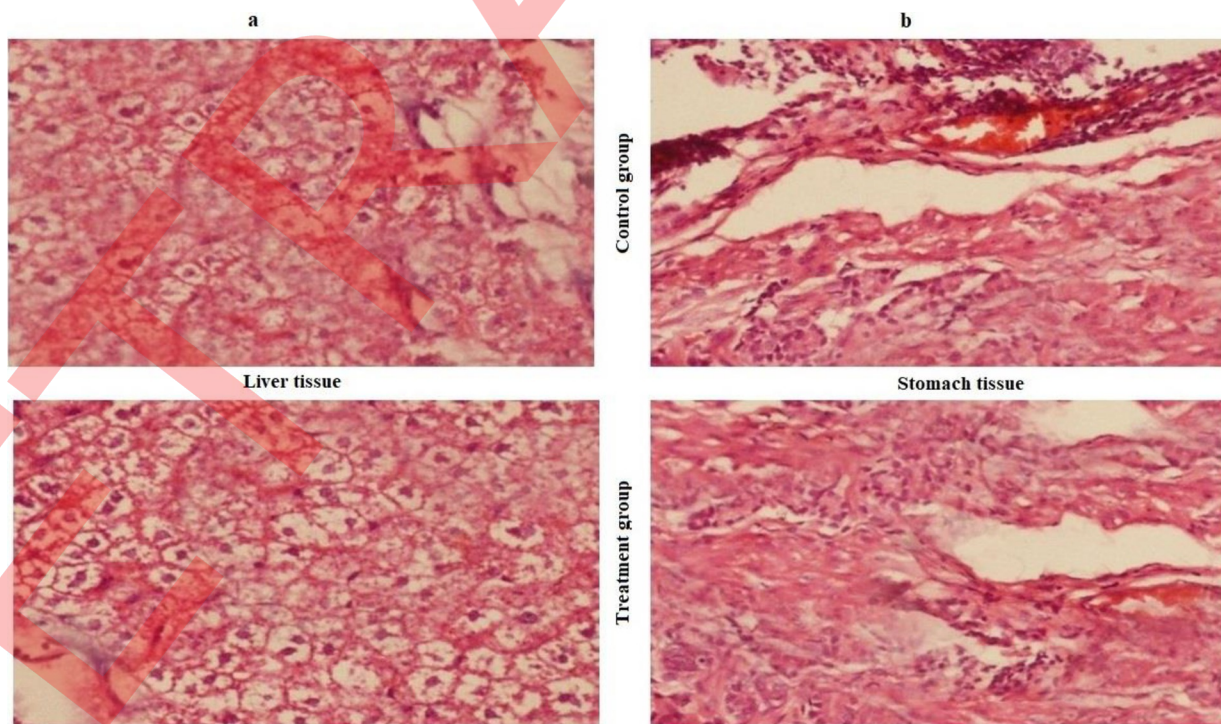

**Fig 8.** Histological examination of Control-group & Treatment-group of rabbit's liver tissue (a) and stomach tissue (b).

<https://doi.org/10.1371/journal.pone.0309101.g008>



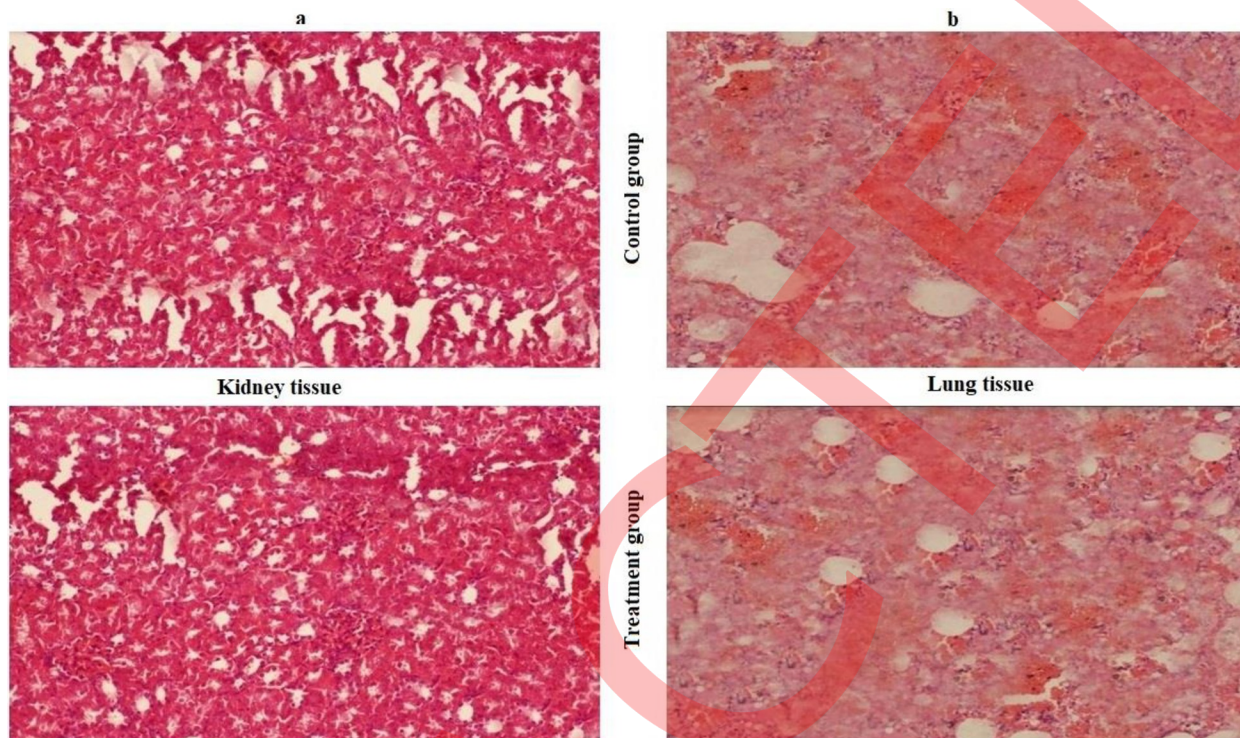

**Fig 9.** Histological examination of Control-group & Treatment-group of rabbit's kidney tissue (a) and lung tissue (b).

<https://doi.org/10.1371/journal.pone.0309101.g009>

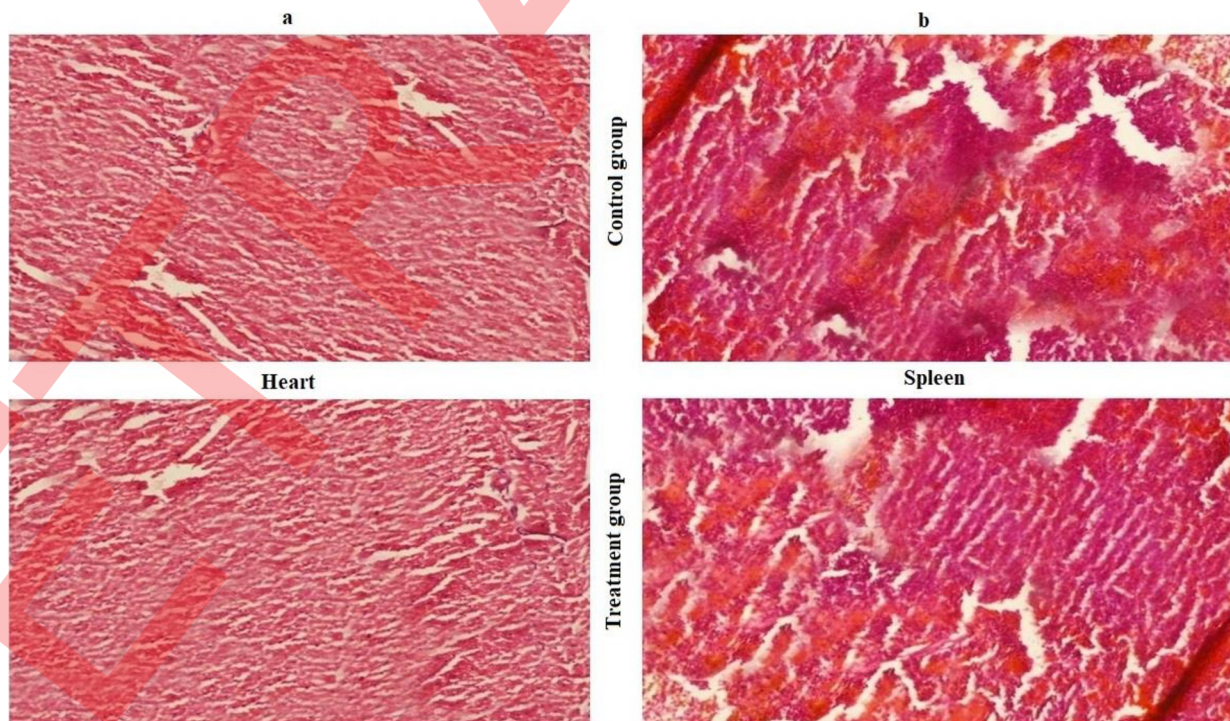

**Fig 10.** Histological examination of Control-group & Treatment-group of rabbit's Heart tissue (a) and spleen tissue (b).

<https://doi.org/10.1371/journal.pone.0309101.g010>

Table 3. TiM-GEL formulation acute toxicity studies in rabbits.

| Observations                     | C-group (Control) n = 3<br>Mean $\pm$ SD | T-group<br>(Tested with 1g/kg TiM- GEL)<br>n = 3 Mean $\pm$ SD |
|----------------------------------|------------------------------------------|----------------------------------------------------------------|
| Sickness                         | None                                     | None                                                           |
| Ophthalmic toxicity              | None                                     | None                                                           |
| Skin irritation                  | None                                     | None                                                           |
| <b>Body weight(gram)</b>         |                                          |                                                                |
| Pre-treatment                    | 1275.5 $\pm$ 23.05                       | 1277.1 $\pm$ 24.26                                             |
| 1 <sup>st</sup> day              | 1276.8 $\pm$ 23.71                       | 1278 $\pm$ 24.26                                               |
| 7 <sup>th</sup> day              | 1282 $\pm$ 21.40                         | 1283.7 $\pm$ 26.01                                             |
| 14 <sup>th</sup> day             | 1286.3 $\pm$ 21.06                       | 1288.3 $\pm$ 25.28                                             |
| <b>Water intake (milliliter)</b> |                                          |                                                                |
| Pre-treatment                    | 209.67 $\pm$ 1.29                        | 210.4 $\pm$ 1.28                                               |
| 1 <sup>st</sup> day              | 210.22 $\pm$ 1.37                        | 211.7 $\pm$ 2.40                                               |
| 7 <sup>th</sup> day              | 211.3 $\pm$ 2.40                         | 212.6 $\pm$ 3.01                                               |
| 14 <sup>th</sup> day             | 213.6 $\pm$ 1.37                         | 212.42 $\pm$ 1.30                                              |
| <b>Food intake (gram)</b>        |                                          |                                                                |
| Pre-treatment                    | 82.21 $\pm$ 0.50                         | 82.7 $\pm$ 0.20                                                |
| 1 <sup>st</sup> day              | 81.59 $\pm$ 0.20                         | 82.03 $\pm$ 0.57                                               |
| 7 <sup>th</sup> day              | 83.41 $\pm$ 0.50                         | 82.91 $\pm$ 1.89                                               |
| 14 <sup>th</sup> day             | 84.12 $\pm$ 1.04                         | 82.21 $\pm$ 2.35                                               |
| Mortality                        | None                                     | None                                                           |

<https://doi.org/10.1371/journal.pone.0309101.t003>

characteristics and release of TiM were significantly affected by the concentration variations of the components employed in the hydrogel formulation, including Pluronic F127, AA, and MBA. Superior swelling outcomes were reported at higher pH levels in comparison to lower

Table 4. Blood biochemistry and hematology.

| Hematology and bio- chemical analysis                 | C-group (Control) n = 3<br>Mean $\pm$ SD | T-group<br>(Tested with 2g/kg TiM- GEL)<br>n = 3 Mean $\pm$ SD |
|-------------------------------------------------------|------------------------------------------|----------------------------------------------------------------|
| Hb (g/dl)                                             | 12.39 $\pm$ 0.03                         | 12.40 $\pm$ 0.03                                               |
| White cells $\times$ 103/cmm                          | 5.49 $\pm$ 0.05                          | 5.46 $\pm$ 0.11                                                |
| Total RBCs<br>(3.8–7.9 $\times$ 106/mm <sup>3</sup> ) | 6.48 $\pm$ 0.15                          | 6.54 $\pm$ 0.21                                                |
| Monocytes %                                           | 3.81 $\pm$ 0.16                          | 3.69 $\pm$ 0.07                                                |
| Lymphocytes (43–80%)                                  | 57.01 $\pm$ 0.66                         | 56.91 $\pm$ 0.30                                               |
| MCV %                                                 | 62.24 $\pm$ 1.08                         | 63.56 $\pm$ 1.45                                               |
| MCH (pg)                                              | 24.22 $\pm$ 1.22                         | 25.66 $\pm$ 1.91                                               |
| MCHC %                                                | 32.34 $\pm$ 1.44                         | 32.12 $\pm$ 2.23                                               |
| Total Cholesterol<br>(10–80 mg/dl)                    | 65.92 $\pm$ 2.23                         | 68.59 $\pm$ 0.89                                               |
| Triglycerides (mg/dl)                                 | 65.12 $\pm$ 3.47                         | 65.61 $\pm$ 2.61                                               |
| Uric acid<br>(1–4.3 mg/dl)                            | 2.40 $\pm$ 0.13                          | 2.69 $\pm$ 0.18                                                |
| Urea (mcg/dl)                                         | 44.67 $\pm$ 3.51                         | 51.26 $\pm$ 2.40                                               |
| Creatinine (mg/dl)                                    | 0.73 $\pm$ 0.16                          | 0.52 $\pm$ 1.52                                                |
| ALT (IU/l)                                            | 107 $\pm$ 2.64                           | 108 $\pm$ 2.64                                                 |
| AST (IU/l)                                            | 75.1 $\pm$ 0.85                          | 72.73 $\pm$ 0.55                                               |

<https://doi.org/10.1371/journal.pone.0309101.t004>



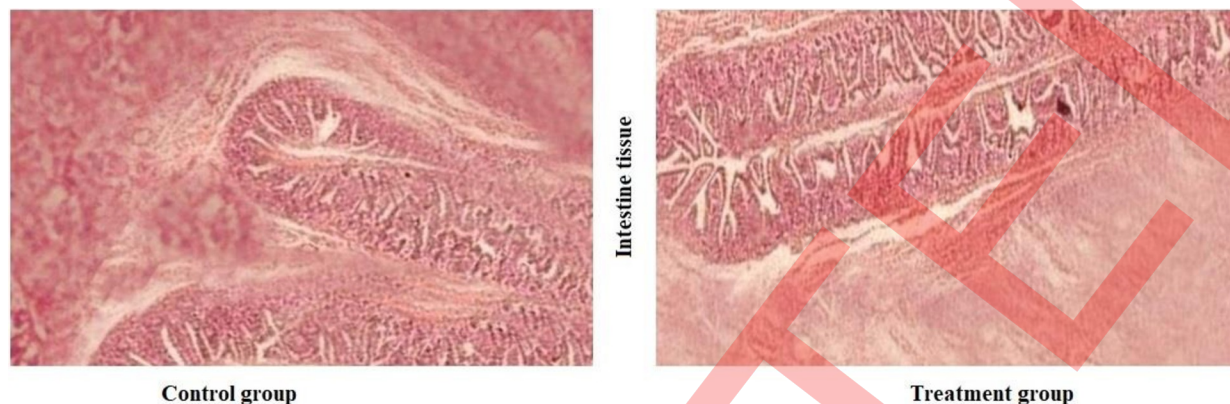

**Fig 11. Histological examination of control group & treatment group of rabbit's intestine tissue.**

<https://doi.org/10.1371/journal.pone.0309101.g011>

pH levels. Kinetic models were utilized to examine the optimal model for polymeric drug delivery systems. The hydrogels were constructed according to the zero-order, Higuchi, and Korsmeyer Peppas models. Oral toxicity experiments have shown that the manufactured polymeric system and its contents are not harmful to living organisms. The findings of this work indicate that Timolol Maleate-Loaded Pluronic F127-co-poly (acrylic acid) Based hydrogels have the potential to serve as a superior method for regulated drug administration, surpassing conventional dosage forms.

## Author Contributions

**Conceptualization:** Kashif Barkat.

**Data curation:** Syed Faisal Badshah.

**Formal analysis:** Irfan Anjum, Muhammad Aamir, Syed Faisal Badshah.

**Funding acquisition:** Irfan Anjum.

**Investigation:** Raneem Mansoor.

**Project administration:** Kashif Barkat.

**Resources:** Syed Faisal Badshah, Riaz Ullah, Zafar Iqbal.

**Software:** Riaz Ullah, Zafar Iqbal.

**Supervision:** Kashif Barkat.

**Visualization:** Zafar Iqbal.

**Writing – original draft:** Muhammad Ahmer Raza.

**Writing – review & editing:** Zafar Iqbal, Muhammad Ahmer Raza.

## References

1. Soares GA, de Castro AD, Cury BS, Evangelista RC. Blends of cross-linked high amylose starch/pectin loaded with diclofenac. *Carbohydrate Polymers*. 2013; 91(1):135–42. <https://doi.org/10.1016/j.carbpol.2012.08.014> PMID: 23044114
2. Malaterre V, Metz H, Ogorka J, Gurny R, Loggia N, Mäder K. Benchtop-magnetic resonance imaging (BT-MRI) characterization of push–pull osmotic controlled release systems. *Journal of Controlled Release*. 2009; 133(1):31–6. <https://doi.org/10.1016/j.jconrel.2008.09.007> PMID: 18840483

3. Tao SL, Desai TA. Microfabricated drug delivery systems: from particles to pores. *Advanced drug delivery reviews*. 2003; 55(3):315–28. [https://doi.org/10.1016/s0169-409x\(02\)00227-2](https://doi.org/10.1016/s0169-409x(02)00227-2) PMID: 12628319
4. Freiberg S, Zhu X. Polymer microspheres for controlled drug release. *International journal of pharmaceuticals*. 2004; 282(1):1–18. <https://doi.org/10.1016/j.ijpharm.2004.04.013> PMID: 15336378
5. Van Tomme SR, Storm G, Hennink WE. In situ gelling hydrogels for pharmaceutical and biomedical applications. *International journal of pharmaceuticals*. 2008; 355(1):1–18. <https://doi.org/10.1016/j.ijpharm.2008.01.057> PMID: 18343058
6. Ahmed EM. Hydrogel: preparation, characterization, and applications. *Journal of advanced research*. 2015; 6:105–21.
7. Gupta P, Vermani K, Garg S. Hydrogels: from controlled release to pH-responsive drug delivery. *Drug discovery today*. 2002; 7(10):569–79. [https://doi.org/10.1016/s1359-6446\(02\)02255-9](https://doi.org/10.1016/s1359-6446(02)02255-9) PMID: 12047857
8. Soares PA, de Seixas JRC, Albuquerque PB, Santos GR, Mourão PA, Barros W, et al. Development and characterization of a new hydrogel based on galactomannan and k-carrageenan. *Carbohydrate polymers*. 2015; 134:673–9.
9. Chen I-C, Su C-Y, Chen P-Y, Hoang TC, Tsou Y-S, Fang H-W. Investigation and Characterization of Factors Affecting Rheological Properties of Poloxamer-Based Thermo-Sensitive Hydrogel. *Polymers*. 2022; 14(24):5353. <https://doi.org/10.3390/polym14245353> PMID: 36559720
10. Peppas N, Bures P, Leobandung W, Ichikawa H. Hydrogels in pharmaceutical formulations. *European journal of pharmaceuticals and biopharmaceuticals*. 2000; 50(1):27–46. [https://doi.org/10.1016/s0939-6411\(00\)00090-4](https://doi.org/10.1016/s0939-6411(00)00090-4) PMID: 10840191
11. Sohail M, Ahmad M, Minhas MU, Liaqat A, Munir A, Khalid I. Synthesis and characterization of graft PVA composites for controlled delivery of valsartan. *Lat Am J Pharm*. 2014; 33(8):1237–44.
12. Ganji F, Vasheghani-Farahani E. Hydrogels in controlled drug delivery systems. *Iran Polym J*. 2009; 18(1):63–88.
13. Anwar H, Ahmad M, Minhas MU, Rehmani S. Alginate-polyvinyl alcohol based interpenetrating polymer network for prolonged drug therapy. Optimization and in-vitro characterization. *Carbohydrate Polymers*. 2017; 166:183–94. <https://doi.org/10.1016/j.carbpol.2017.02.080> PMID: 28385222
14. Elliott JE, Macdonald M, Nie J, Bowman CN. Structure and swelling of poly (acrylic acid) hydrogels: effect of pH, ionic strength, and dilution on the crosslinked polymer structure. *Polymer*. 2004; 45(5):1503–10.
15. Escobar-Chávez JJ, López-Cervantes M, Naik A, Kalia Y, Quintanar-Guerrero D, Ganem-Quintanar A. Applications of thermo-reversible pluronic F-127 gels in pharmaceutical formulations. *Journal of Pharmacy & Pharmaceutical Sciences*. 2006; 9(3):339–58. PMID: 17207417
16. Chun KW, Lee JB, Kim SH, Park TG. Controlled release of plasmid DNA from photo-cross-linked pluronic hydrogels. *Biomaterials*. 2005; 26(16):3319–26. <https://doi.org/10.1016/j.biomaterials.2004.07.055> PMID: 15603827
17. Karavasili C, Komnenou A, Katsamenis OL, Charalampidou G, Kofidou E, Andreadis D, et al. Self-Assembling Peptide Nanofiber Hydrogels for Controlled Ocular Delivery of Timolol Maleate. *ACS Biomaterials Science & Engineering*. 2017; 3(12):3386–94.
18. Design Lall D., characterization and evaluation of hydrogel based Timolol formulation for effective treatment of Glaucoma. *Asian Journal of Pharmacy and Pharmacology*. 2020; 6(4):231–8.
19. Anwar F, Mahmood E, Sharif S, Shah R, Jamgochian M, Ouellette S, et al. Topical Application of 0.5% Timolol Maleate Hydrogel for the Treatment of Superficial Infantile Hemangiomas. *Journal of drugs in dermatology: JDD*. 2023; 22(6):594–8. <https://doi.org/10.36849/JDD.7054> PMID: 37276157
20. Yuan Xiong X, Chiu Tam K, Huat Gan L. Synthesis and thermally responsive properties of novel pluronic F87/polycaprolactone (PCL) block copolymers with short PCL blocks. *Journal of applied polymer science*. 2006; 100(5):4163–72.
21. Bromberg L. Polyether-modified poly (acrylic acid): synthesis and applications. *Industrial & engineering chemistry research*. 1998; 37(11):4267–74.
22. Rafique N, Ahmad M, Minhas MU, Badshah SF, Malik NS, Khan KU. Designing gelatin-based swellable hydrogels system for controlled delivery of salbutamol sulphate: Characterization and toxicity evaluation. *Polym Bull*. 2022; 79(7):4535–61.
23. Liaqat H, Badshah SF, Minhas MU, Barkat K, Khan SA, Hussain MD, et al. pH-Sensitive Hydrogels Fabricated with Hyaluronic Acid as a Polymer for Site-Specific Delivery of Mesalamine. *ACS Omega*. 2024. <https://doi.org/10.1021/acsomega.4c03240> PMID: 38973903
24. Badshah SF, Minhas MU, Khan KU, Barkat K, Abdullah O, Munir A, et al. Structural and in-vitro characterization of highly swellable  $\beta$ -cyclodextrin polymeric nanogels fabricated by free radical polymerization for solubility enhancement of rosuvastatin. *Particulate Science and Technology*. 2023; 41(8):1131–45.

25. Popa L, Ghica MV, Dinu-Pirvu C. Hydrogels: Smart materials for biomedical applications: BoD–Books on Demand; 2019.
26. Badshah SF, Akhtar N, Minhas MU, Khan KU, Khan S, Abdullah O, et al. Porous and highly responsive cross-linked  $\beta$ -cyclodextrin based nanomatrices for improvement in drug dissolution and absorption. *Life Sciences*. 2021; 267:118931.
27. Akkari AC, Papini JZB, Garcia GK, Franco MKD, Cavalcanti LP, Gasperini A, et al. Poloxamer 407/188 binary thermosensitive hydrogels as delivery systems for infiltrative local anesthesia: Physico-chemical characterization and pharmacological evaluation. *Materials Science and Engineering: C*. 2016; 68:299–307. <https://doi.org/10.1016/j.msec.2016.05.088> PMID: 27524024
28. Masteikova R, Chalupova Z, Sklupalova Z. Stimuli-sensitive hydrogels in controlled and sustained drug delivery. *Medicina*. 2003; 39(2):19–24. PMID: 14617853
29. Lo Y-L, Hsu C-Y, Lin H-R. pH-and thermo-sensitive pluronic/poly (acrylic acid) in situ hydrogels for sustained release of an anticancer drug. *Journal of Drug Targeting*. 2013; 21(1):54–66. <https://doi.org/10.3109/1061186X.2012.725406> PMID: 23009351
30. Pascoal A, da Silva P, Pinheiro MC. Drug dissolution profiles from polymeric matrices: Data versus numerical solution of the diffusion problem and kinetic models. *International Communications in Heat and Mass Transfer*. 2015; 61:118–27.
31. Ali M, Horikawa S, Venkatesh S, Saha J, Hong JW, Byrne ME. Zero-order therapeutic release from imprinted hydrogel contact lenses within in vitro physiological ocular tear flow. *Journal of Controlled Release*. 2007; 124(3):154–62. <https://doi.org/10.1016/j.jconrel.2007.09.006> PMID: 17964678
32. Grindel JM, Jaworski T, Emanuele RM, Culbreth P. Pharmacokinetics of a novel surface-active agent, purified poloxamer 188, in rat, rabbit, dog and man. *Biopharmaceutics & drug disposition*. 2002; 23(3):87–103. <https://doi.org/10.1002/bdd.297> PMID: 12173548
33. Moharram M, Allam MA. Study of the interaction of poly (acrylic acid) and poly (acrylic acid-poly acrylamide) complex with bone powders and hydroxyapatite by using TGA and DSC. *Journal of applied polymer science*. 2007; 105(6):3220–7.
34. Alexandridis P, Holzwarth JF. Differential scanning calorimetry investigation of the effect of salts on aqueous solution properties of an amphiphilic block copolymer (Poloxamer). *Langmuir*. 1997; 13(23):6074–82.
35. Che Ani N, Jamari SS, Wan Yaacob WSN, editors. Effect of cross-linker concentration on the synthesis and swelling behaviour of superabsorbent polymers (SAP) using graft polymerization techniques. *Key Engineering Materials*; 2017: Trans Tech Publ.
36. Fulgêncio GdO Viana FAB, Ribeiro RR Yoshida MI, Faraco AG Cunha-Júnior AdS. New mucoadhesive chitosan film for ophthalmic drug delivery of timolol maleate: in vivo evaluation. *Journal of Ocular Pharmacology and therapeutics*. 2012; 28(4):350–8. <https://doi.org/10.1089/jop.2011.0174> PMID: 22320419
37. Newa M, Bhandari KH, Li DX, Kwon T-H, Kim JA, Yoo BK, et al. Preparation, characterization and in vivo evaluation of ibuprofen binary solid dispersions with poloxamer 188. *International journal of pharmaceutics*. 2007; 343(1–2):228–37. <https://doi.org/10.1016/j.ijpharm.2007.05.031> PMID: 17597315
38. Nanaki S, Eleftheriou RM, Barmplexis P, Kostoglou M, Karavas E, Bikiaris D. Evaluation of dissolution enhancement of aprepitant drug in ternary pharmaceutical solid dispersions with Soluplus® and Poloxamer 188 prepared by melt mixing. *Sci*. 2019; 1(2):48.
39. Mehta P, Al-Kinani AA, Arshad MS, Chang M-W, Alany RG, Ahmad Z. Development and characterisation of electrospun timolol maleate-loaded polymeric contact lens coatings containing various permeation enhancers. *International journal of pharmaceutics*. 2017; 532(1):408–20. <https://doi.org/10.1016/j.ijpharm.2017.09.029> PMID: 28917987
40. Passerini N, Albertini B, González-Rodríguez ML, Cavallari C, Rodriguez L. Preparation and characterisation of ibuprofen–poloxamer 188 granules obtained by melt granulation. *European Journal of Pharmaceutical Sciences*. 2002; 15(1):71–8. [https://doi.org/10.1016/s0928-0987\(01\)00210-x](https://doi.org/10.1016/s0928-0987(01)00210-x) PMID: 11803133
41. Roy H, Nayak BS, Nandi S. Poloxamer based Urapidil Loaded Chitosan Microparticle in Approach to Improve the Mechanical Strength by Tensile Strength and Entrapment Determination. *Current Drug Therapy*. 2022; 17(1):56–70.
42. Shah AV, Serajuddin AT. Development of solid self-emulsifying drug delivery system (SEDDS) I: use of poloxamer 188 as both solidifying and emulsifying agent for lipids. *Pharmaceutical research*. 2012; 29:2817–32. <https://doi.org/10.1007/s11095-012-0704-x> PMID: 22371051
43. Aytimur A, Koçyiğit S, Uslu İ. Synthesis and characterization of poly (vinyl alcohol)/poly (vinyl pyrrolidone)-iodine nanofibers with poloxamer 188 and chitosan. *Polymer-Plastics Technology and Engineering*. 2013; 52(7):661–6.

44. Roy H, Nayak BS, Nandi S. In Silico; Factorial Screening and Optimization of Chitosan Based Gel for Urapidil Loaded Microparticle using Reduced Factorial Design. *Combinatorial Chemistry & High Throughput Screening*. 2020; 23(10):1049–63.
45. Magami SM, Williams RL. Gelation studies on acrylic acid-based hydrogels via in situ photo-crosslinking and rheology. *Journal of Applied Polymer Science*. 2018; 135(38):46691.
46. Bukhari SMH, Khan S, Rehanullah M, Ranjha NM. Synthesis and characterization of chemically cross-linked acrylic acid/gelatin hydrogels: effect of pH and composition on swelling and drug release. *International Journal of Polymer Science*. 2015;2015.
47. Samanta HS, Ray SK. Synthesis, characterization, swelling and drug release behavior of semi-interpenetrating network hydrogels of sodium alginate and polyacrylamide. *Carbohydrate polymers*. 2014; 99:666–78. <https://doi.org/10.1016/j.carbpol.2013.09.004> PMID: 24274557
48. Devi DR, Sandhya P, Hari BV. Poloxamer: a novel functional molecule for drug delivery and gene therapy. *Journal of Pharmaceutical Sciences and Research*. 2013; 5(8):159.
49. Nesrinne S, Djamel A. Synthesis, characterization and rheological behavior of pH sensitive poly (acrylamide-co-acrylic acid) hydrogels. *Arabian Journal of Chemistry*. 2017; 10(4):539–47.
50. Barkat K, Ahmad M, Minhas MU, Khalid I. Oxaliplatin-loaded crosslinked polymeric network of chondroitin sulfate-co-poly (methacrylic acid) for colorectal cancer: its toxicological evaluation. *Journal of Applied Polymer Science*. 2017; 134(38):45312.
51. Kulkarni SP, Amin PD. Stability indicating HPTLC determination of timolol maleate as bulk drug and in pharmaceutical preparations. *Journal of pharmaceutical and biomedical analysis*. 2000; 23(6):983–7. [https://doi.org/10.1016/s0731-7085\(00\)00389-7](https://doi.org/10.1016/s0731-7085(00)00389-7) PMID: 11095299
52. Hiratani H, Alvarez-Lorenzo C. The nature of backbone monomers determines the performance of imprinted soft contact lenses as timolol drug delivery systems. *Biomaterials*. 2004; 25(6):1105–13. [https://doi.org/10.1016/s0142-9612\(03\)00622-7](https://doi.org/10.1016/s0142-9612(03)00622-7) PMID: 14615176
53. Law T, Whateley T, Florence A. Some chemically modified poloxamer hydrogels: preparation, morphology and swelling properties. *International journal of pharmaceutics*. 1984; 21(3):277–87.
54. Stanojević M, Krušić MK, Filipović J, Parojčić J, Stupar M. An investigation into the influence of hydrogel composition on swelling behavior and drug release from poly (acrylamide-co-itaconic acid) hydrogels in various media. *Drug delivery*. 2006; 13(1):1–7. <https://doi.org/10.1080/10717540500313034> PMID: 16401587
55. Korsmeyer RW, Von Meerwall E, Peppas NA. Solute and penetrant diffusion in swellable polymers. II. Verification of theoretical models. *Journal of Polymer Science Part B: Polymer Physics*. 1986; 24(2):409–34.
